# Supplementary material for: Triple-cation low-bandgap perovskite thin-films for high-efficiency four-terminal all-perovskite tandem solar cells
Source: Royal Society of Chemistry journal article supplement (doi:10.1039/d0ta07005j), 2020-01-01
Supplement: d0ta07005j1.pdf [file d0ta07005j1.pdf]

## Supplementary Information

### Triple-Cation Low-Bandgap Perovskite Thin-Films for High-Efficiency Four-Terminal All-Perovskite Tandem Solar Cells

Somayeh Moghadamzadeh,<sup>a,b,\*</sup> Ihtez M. Hossain,<sup>b,a</sup> The Duong,<sup>c</sup> Saba Gharibzadeh,<sup>b,a</sup> Tobias Abzieher,<sup>a,b</sup> Huyen Pham,<sup>d</sup> Hang Hu,<sup>b,a</sup> Paul Fassel,<sup>b,a</sup> Uli Lemmer,<sup>a,b</sup> Bahram Abdollahi Nejad,<sup>b,a,\*</sup> and Ulrich W. Paetzold<sup>b,a,\*</sup>

<sup>a</sup> Light Technology Institute (LTI), Karlsruhe Institute of Technology (KIT), Engesserstrasse 13, 76131, Karlsruhe, Germany

<sup>b</sup> Institute of Microstructure Technology (IMT), Karlsruhe Institute of Technology (KIT), Hermann-von-Helmholtz-Platz 1, 76344 Eggenstein-Leopoldshafen, Karlsruhe, Germany

<sup>c</sup> Research School of Electrical, Energy and Materials Engineering, The Australian National University, Canberra 2601, Australia

<sup>d</sup> Department of Electronic Materials Engineering, Research School of Physics, The Australian National University, Canberra 2601, Australia

\* To whom correspondence should be addressed email: [somayeh.moghadamzadeh@kit.edu](mailto:somayeh.moghadamzadeh@kit.edu), [bahram.abdollahi@kit.edu](mailto:bahram.abdollahi@kit.edu), [ulrich.paetzold@kit.edu](mailto:ulrich.paetzold@kit.edu)

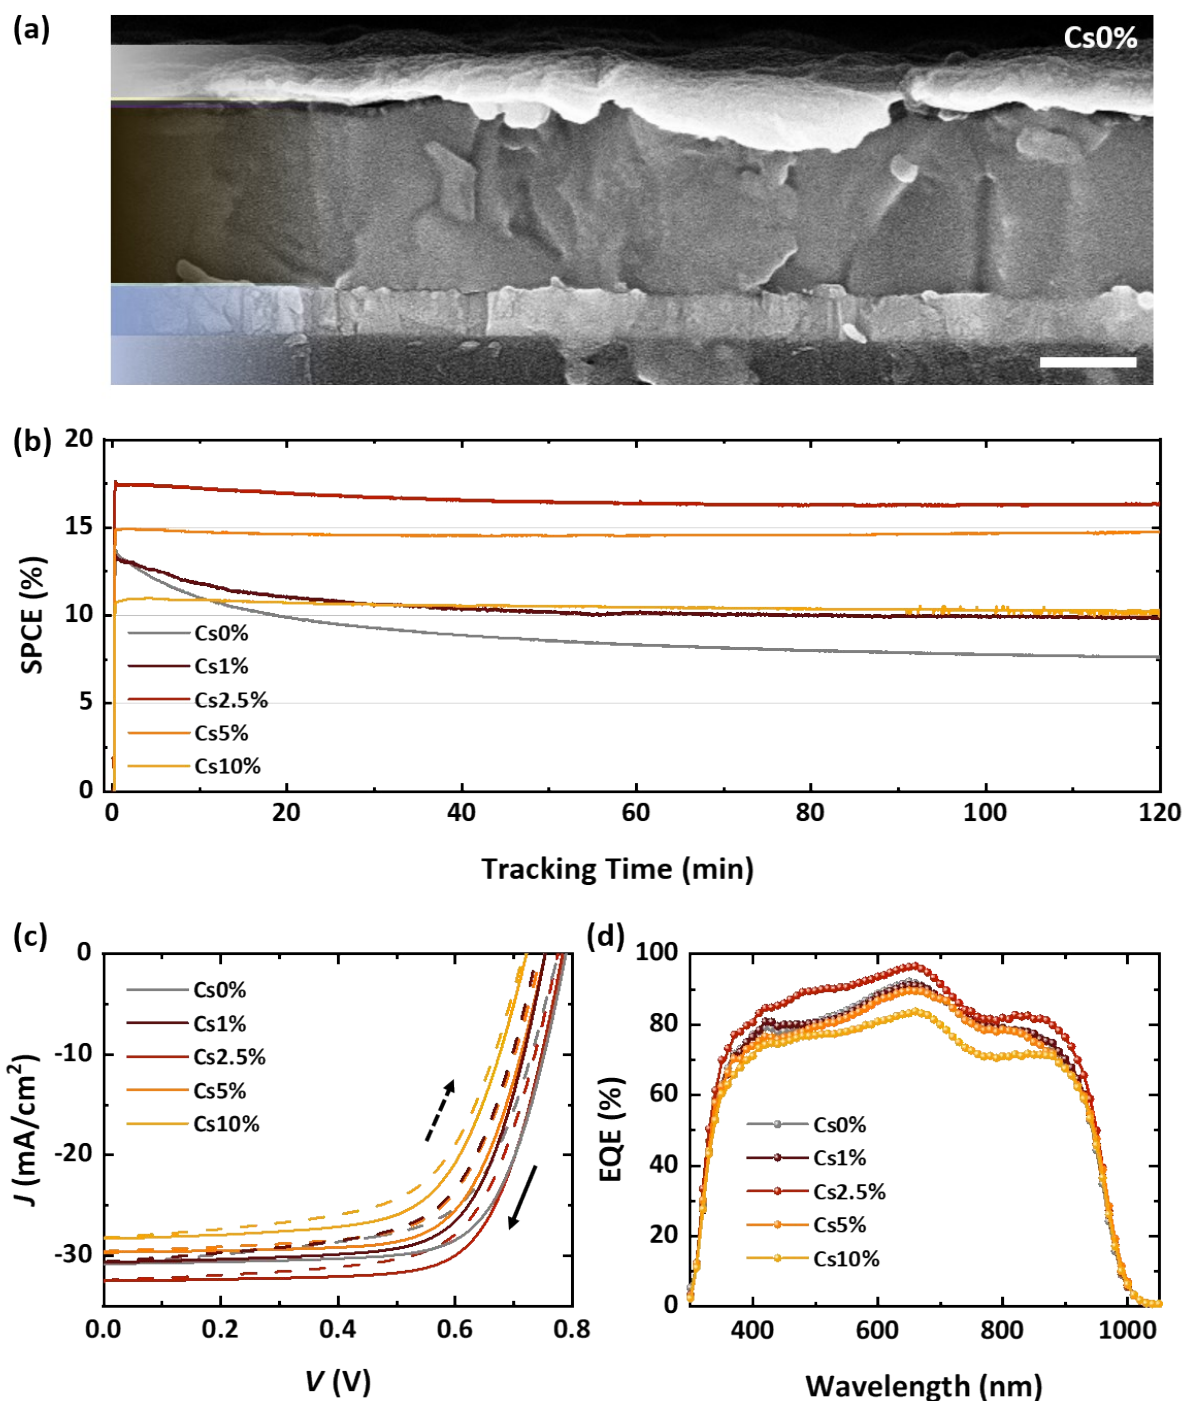

**Fig. S1.** (a) Cross-sectional SEM image of a PSC with a layer stack of glass / ITO / PTAA /  $\text{Cs}_x(\text{FA}_{0.8}\text{MA}_{0.2})_{1-x}\text{Sn}_{0.5}\text{Pb}_{0.5}\text{I}_3$  / PCBM /  $\text{C}_{60}$  / BCP / Ag, for which  $x = 0$  (denoted as Cs0%). The scalebar on the bottom-right is indicative of 300 nm. (b) Absolute values of stabilized power conversion efficiency (SPCE) at the MPP tracking conditions for 120 min, (c) current-density–voltage ( $J$ - $V$ ) scans measured at a fixed rate of 0.6 V/s from the open-circuit voltage ( $V_{\text{OC}}$ ) to the short-circuit current ( $J_{\text{SC}}$ ) (solid lines) and from  $J_{\text{SC}}$  to  $V_{\text{OC}}$  (dashed lines) under AM 1.5G illumination (100 mW/cm<sup>2</sup>) at 25°C, of the best performing LBG PSCs prepared with different Cs concentrations varying from 0% to 10% (denoted as Cs0% to Cs10%). Comparing figure a with b demonstrates that the actual PCEs of the PSCs lie in the middle between the forward and backward scans. (d) the external quantum efficiency (EQE) of devices with perovskite thin-films prepared with different Cs concentrations.

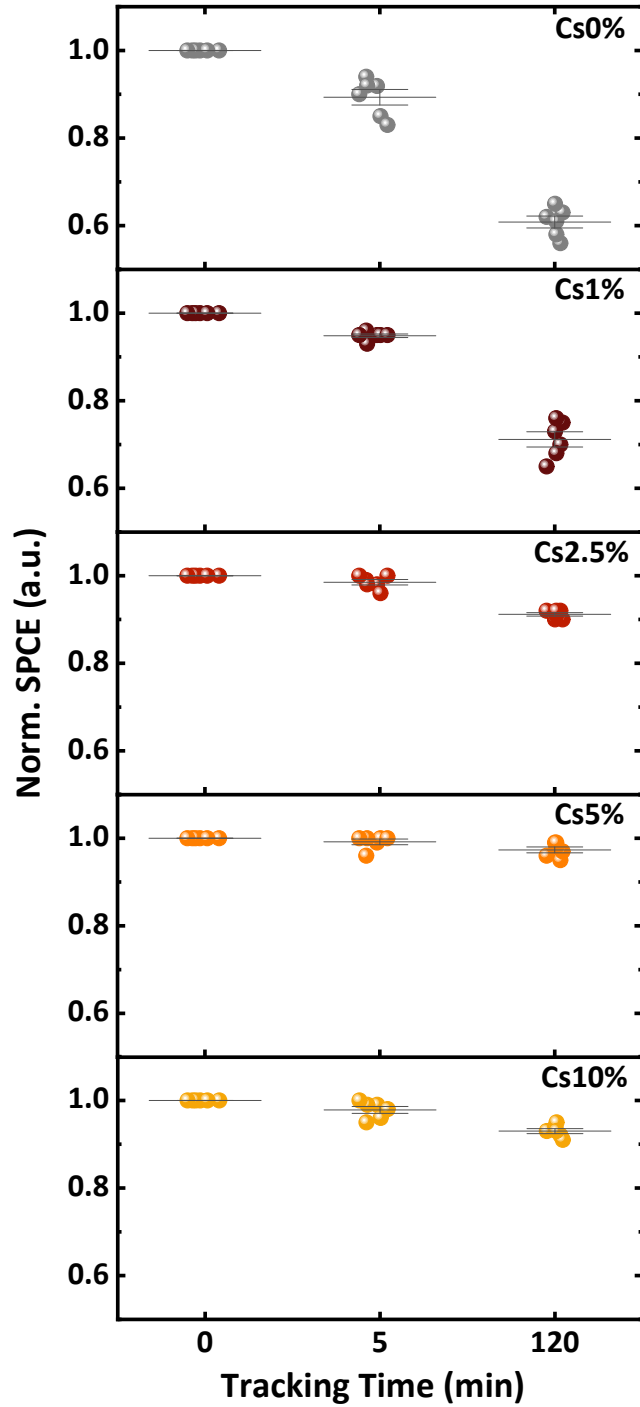

**Fig. S2.** Stabilized power conversion efficiency (SPCE) at 0 min (when the lamp is switched on), and after 5 and 120 min of maximum power point (MPP) tracking, derived from six low-bandgap perovskite solar cells (LBG PSCs) with different Cs concentrations varying from 0% (top) to 10% (bottom) which were identically-prepared in different batches. The initial values (at 0 min) are normalized to 1.

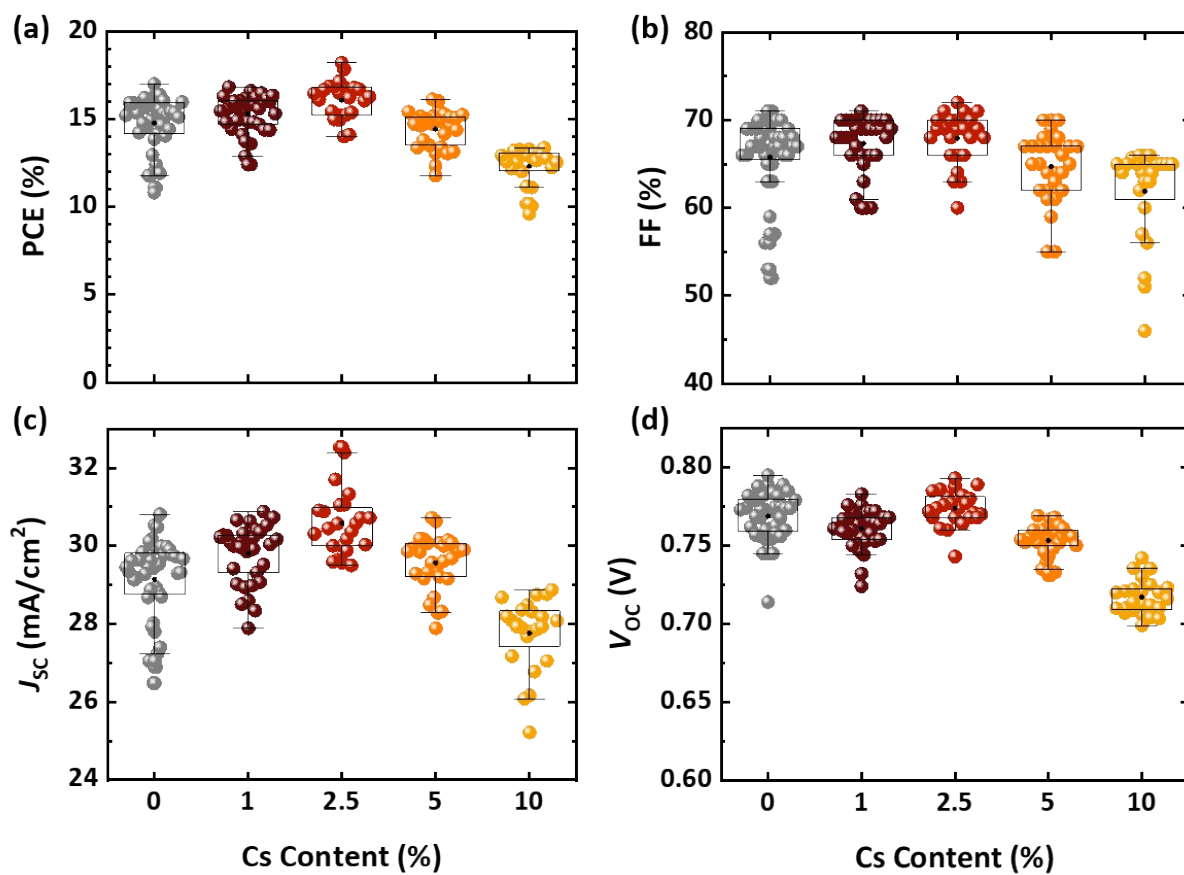

**Fig. S3.** (a) Power conversion efficiency (PCE), (b) fill factor (FF), (c) short-circuit current ( $J_{sc}$ ), and (d) open-circuit voltage ( $V_{oc}$ ) of 30 low-bandgap perovskite solar cells (LBG PSCs) with different Cs concentrations varying from 0% to 10%, identically-prepared in 10 different batches. The black dots show the average values.

**Table S1.** Photovoltaic parameters (champion (Ch.) and average (Ave.) values) of low-bandgap perovskite solar cells (LBG PSCs) with different Cs concentrations varying from 0% to 10%, derived from current-density–voltage ( $J$ – $V$ ) scans measured at a fixed rate of 0.6 V/s from the open-circuit voltage ( $V_{OC}$ ) to the short-circuit current ( $J_{SC}$ ) (backward scan) and from  $J_{SC}$  to  $V_{OC}$  (forward scan) under AM 1.5G illumination (100 mW/cm<sup>2</sup>) at 25°C. The average (Ave.) values are derived from 30 LBG PSCs identically-prepared in 10 different batches.

| Cs concentration | Scan direction | $V_{OC}$ (V) |      | $J_{SC}$ (mA/cm <sup>2</sup> ) |      | FF (%) |      | PCE (%) |      |
|------------------|----------------|--------------|------|--------------------------------|------|--------|------|---------|------|
|                  |                | Ch.          | Ave. | Ch.                            | Ave. | Ch.    | Ave. | Ch.     | Ave. |
| Cs0%             | Backward       | 0.79         | 0.77 | 30.8                           | 29.1 | 70.6   | 65.8 | 17.2    | 14.8 |
|                  | Forward        | 0.77         | 0.76 | 30.9                           | 28.9 | 63.3   | 60.5 | 15.2    | 13.2 |
| Cs1%             | Backward       | 0.75         | 0.76 | 30.7                           | 29.8 | 69.2   | 67.3 | 16.0    | 15.3 |
|                  | Forward        | 0.74         | 0.75 | 30.6                           | 29.7 | 63.4   | 62.0 | 14.3    | 13.8 |
| Cs2.5%           | Backward       | 0.78         | 0.78 | 32.5                           | 30.6 | 71.8   | 68   | 18.2    | 16.1 |
|                  | Forward        | 0.77         | 0.77 | 32.5                           | 30.4 | 66.5   | 63.7 | 16.7    | 14.8 |
| Cs5%             | Backward       | 0.75         | 0.75 | 29.7                           | 29.6 | 68.9   | 64.7 | 15.4    | 14.4 |
|                  | Forward        | 0.75         | 0.75 | 29.6                           | 29.3 | 65.7   | 61.2 | 14.5    | 13.3 |
| Cs10%            | Backward       | 0.72         | 0.72 | 28.3                           | 27.8 | 65.3   | 62.0 | 13.3    | 12.3 |
|                  | Forward        | 0.72         | 0.73 | 28.3                           | 26.5 | 61.4   | 61.1 | 12.4    | 11.9 |

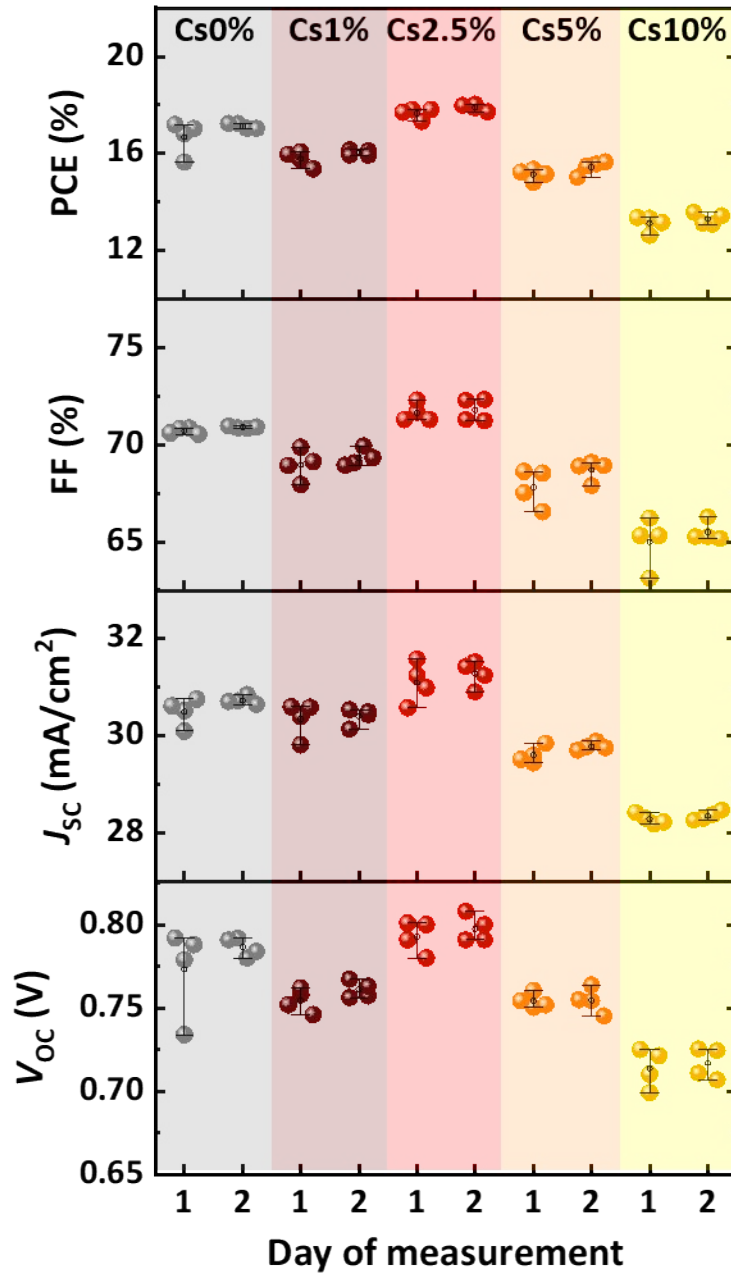

**Fig. S4.** Power conversion efficiency (PCE), fill factor (FF), short-circuit current ( $J_{sc}$ ), and open-circuit voltage ( $V_{oc}$ ) of champion PSCs (from different batches) with different Cs concentrations measured on day 1 (day of device completion) and day 2 (after one night of storage in a dark inert atmosphere).

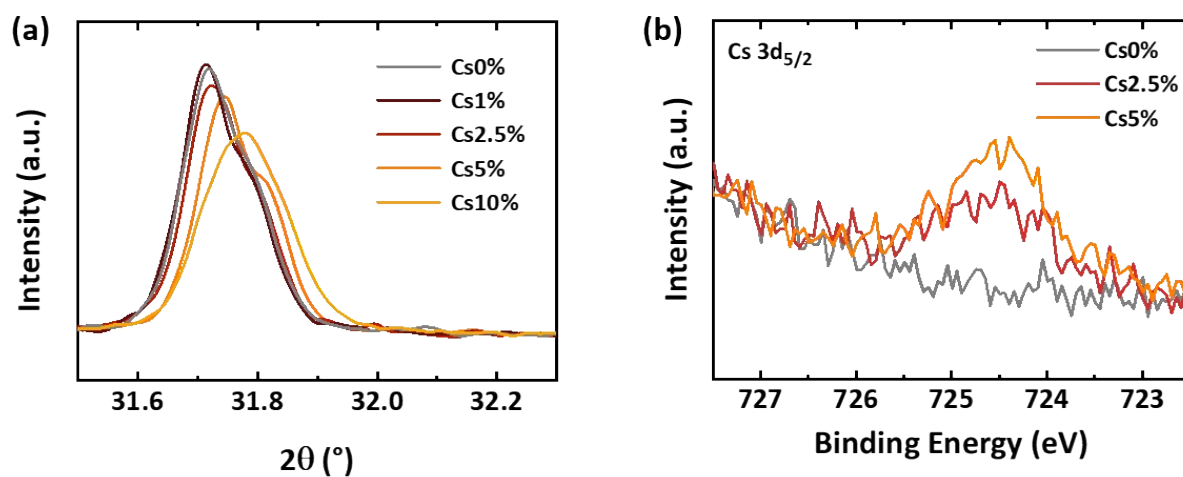

**Fig. S5.** (a) X-ray diffraction (XRD) peaks assigned to (114)/(310) planes of the  $\text{Cs}_x(\text{FA}_{0.8}\text{MA}_{0.2})_{(1-x)}\text{Sn}_{0.5}\text{Pb}_{0.5}\text{I}_3$  low-bandgap perovskite thin-films shifting to higher diffraction angles by increasing  $x$ . (b) X-ray photoelectron spectroscopy (XPS) spectra of the Cs  $3d_{5/2}$  core level of the low-bandgap perovskite thin-films samples with different Cs concentrations varying from 0% to 2.5% and 5%.

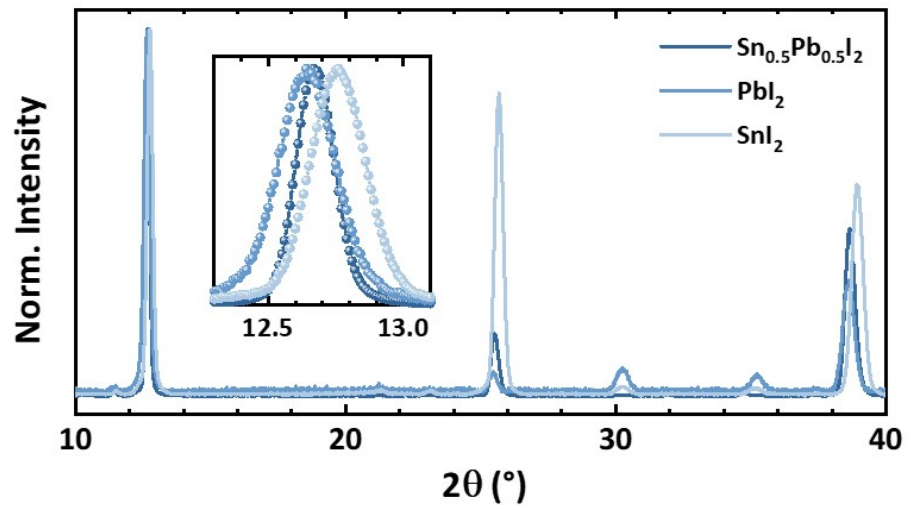

**Fig. S6.** XRD patterns collected from  $\text{PbI}_2$ ,  $\text{SnI}_2$ , and  $\text{Sn}_{0.5}\text{Pb}_{0.5}\text{I}_2$  thin-films (inset compares the position of the main peak of the three thin-films).



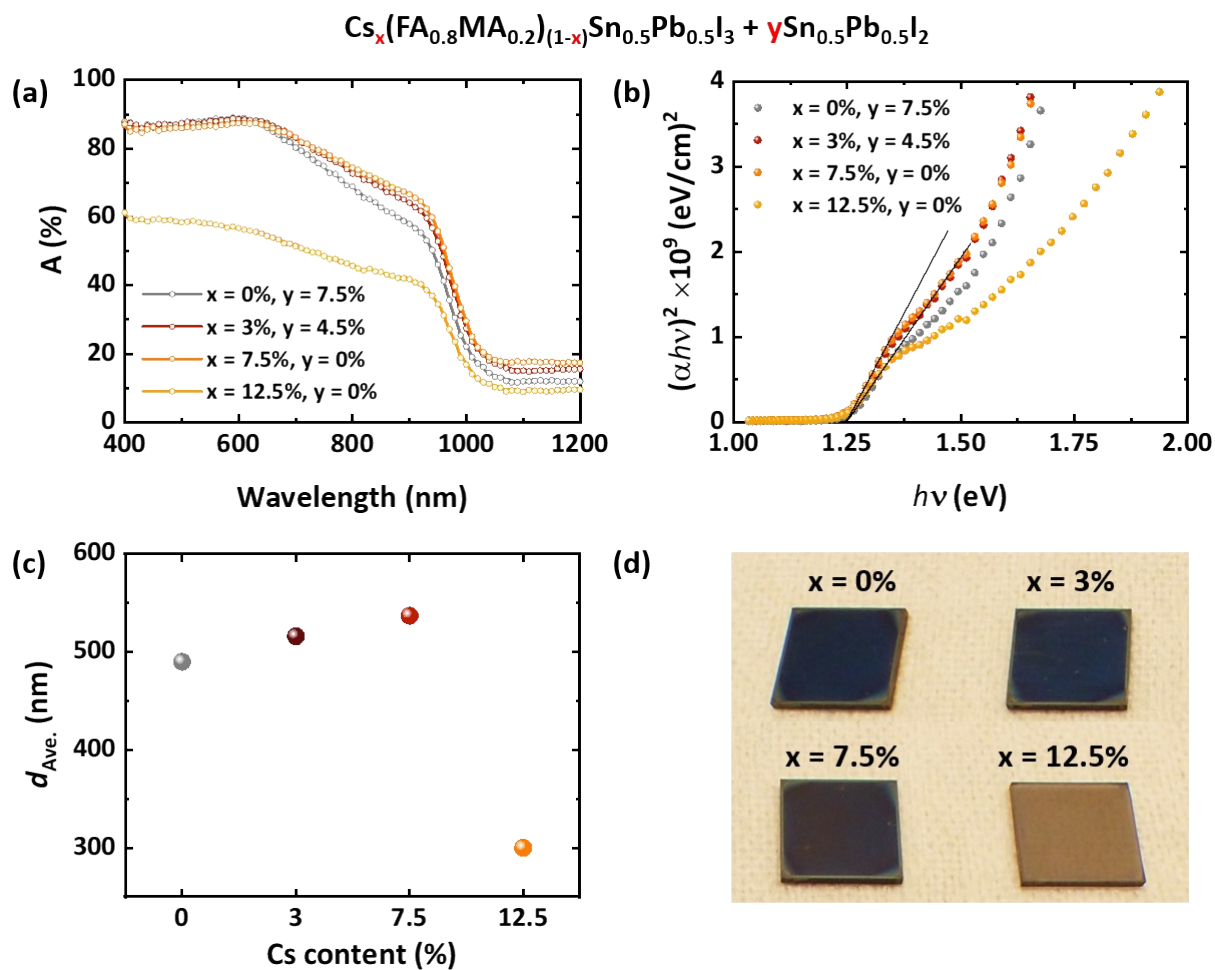

**Fig. S7.** (a) Absorbance spectra (A), (b) Tauc plot, (c) the average thickness ( $d_{\text{Ave.}}$ ), and (d) picture of  $\text{Cs}_x(\text{FA}_{0.8}\text{MA}_{0.2})_{(1-x)}\text{Sn}_{0.5}\text{Pb}_{0.5}\text{I}_3$  thin-films prepared with excess Sn and Pb for different Cs concentrations of  $x = 0\%$ ,  $3\%$ ,  $7.5\%$ , and  $12.5\%$ . All the thin-films are deposited on glass substrates. The average thickness ( $d_{\text{Ave.}}$ ) of each thin-film is an average of ten values obtained from two different samples on five different spots on each.

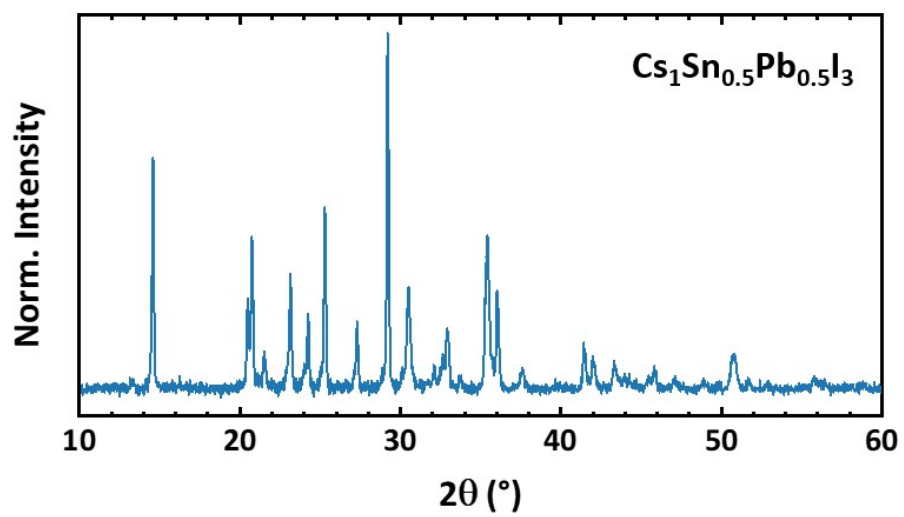

**Fig. S8.** X-ray diffraction (XRD) patterns of  $\text{Cs}_1\text{Sn}_{0.5}\text{Pb}_{0.5}\text{I}_3$  perovskite thin-film.

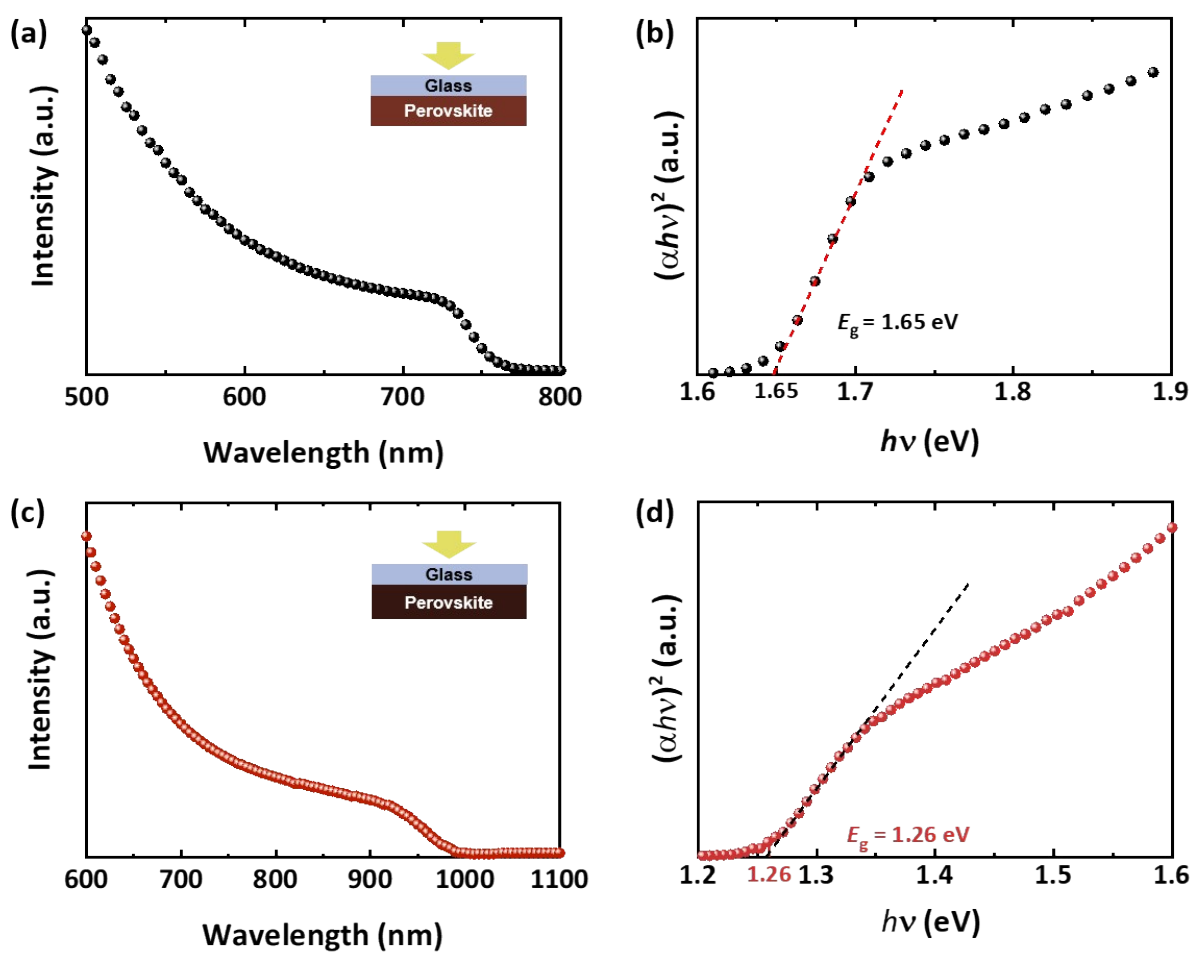

Fig.

S9. UV-vis absorbance spectra and Tauc plots of a double-cation  $\text{Cs}_{0.17}\text{FA}_{0.83}\text{Pb}(\text{I}_{0.76}\text{Br}_{0.24})_3$  perovskite thin-film with a bandgap of  $E_g = 1.65$  eV (a and b), and a triple cation  $\text{Cs}_{0.025}(\text{FA}_{0.8}\text{MA}_{0.2})_{0.075}\text{Sn}_{0.5}\text{Pb}_{0.5}\text{I}_3$  low-bandgap perovskite thin-film with a bandgap of  $E_g = 1.26$  eV (c and d), both deposited on glass substrates.

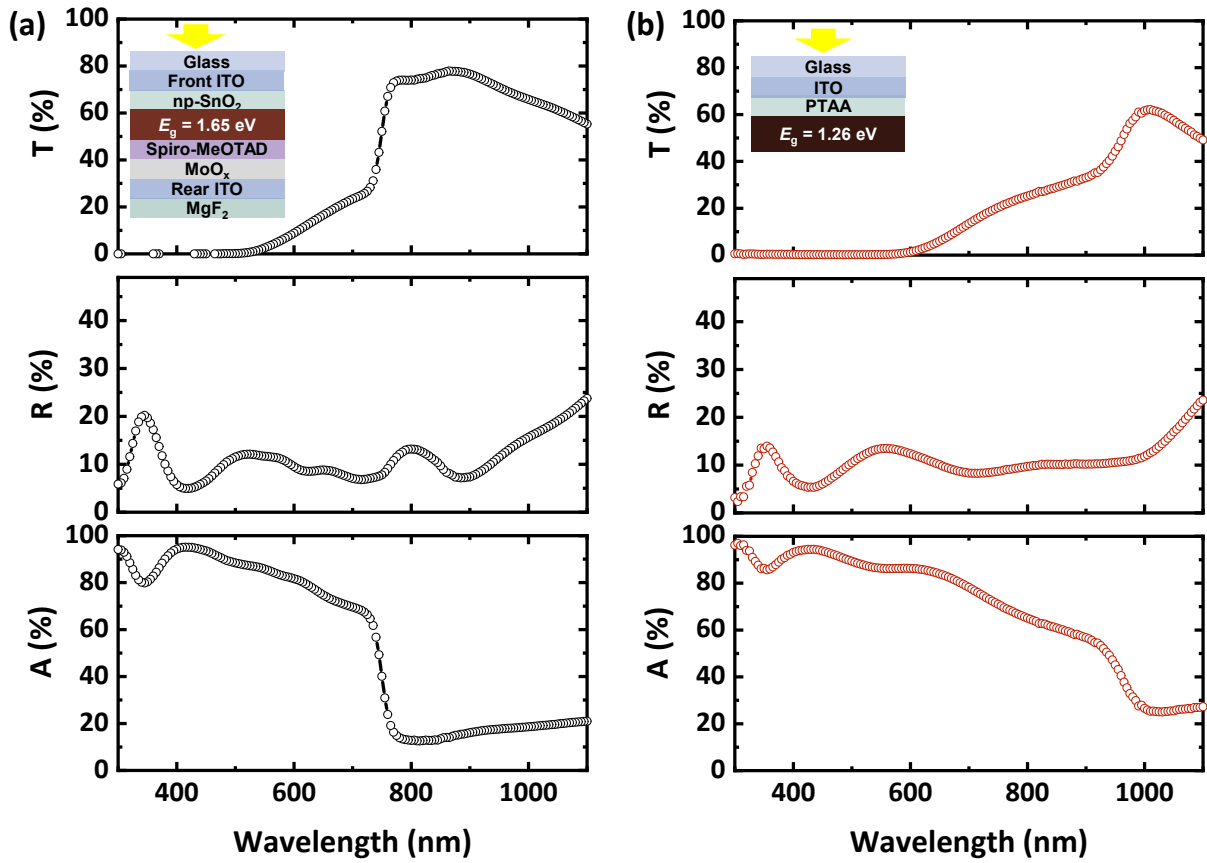

**Fig. S10.** Transmittance (T), reflectance (R), and absorbance (A) spectra of (a) a semitransparent perovskite filter composed of a double-cation  $\text{Cs}_{0.17}\text{FA}_{0.83}\text{Pb}(\text{I}_{0.76}\text{Br}_{0.24})_3$  perovskite thin-film with a bandgap of  $E_g = 1.65$  eV, and (b) a triple cation  $\text{Cs}_{0.025}(\text{FA}_{0.8}\text{MA}_{0.2})_{0.075}\text{Sn}_{0.5}\text{Pb}_{0.5}\text{I}_3$  low-bandgap perovskite thin-film with a bandgap of  $E_g = 1.26$  eV, deposited on PTAA-coated ITO.

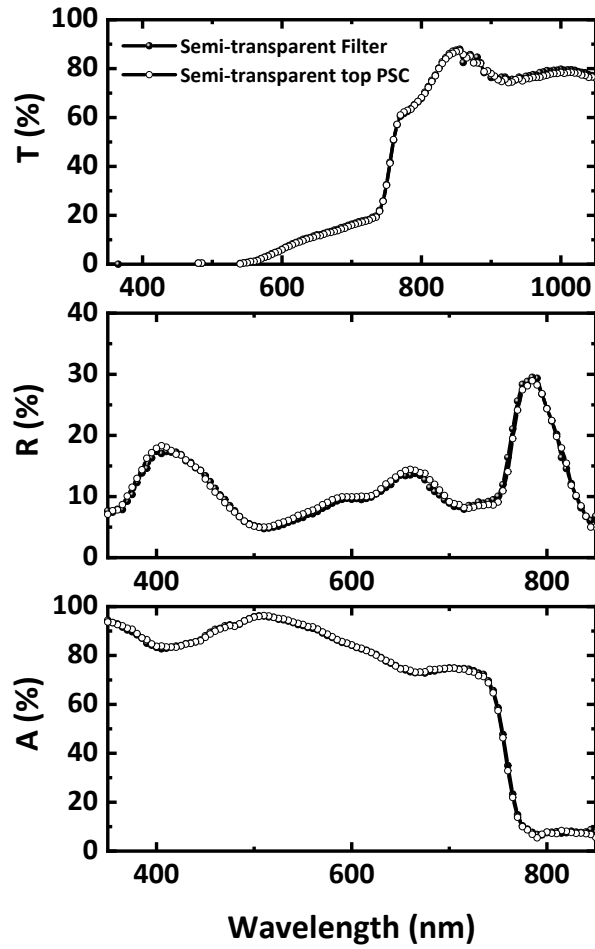

**Fig. S11.** Transmittance (T), reflectance (R), and absorptance (A) spectra of a semitransparent perovskite filter and a semi-transparent top PSC, composed of a double-cation  $\text{Cs}_{0.17}\text{FA}_{0.83}\text{Pb}(\text{I}_{0.76}\text{Br}_{0.24})_3$  perovskite thin-film with a bandgap of  $E_g = 1.65$  eV. The relative difference in transmittance and reflectance on average (derived from three filters and three PSCs) is equal to  $\pm 1.1\%$  and  $\pm 0.1\%$ , respectively (weighted to AM1.5G).

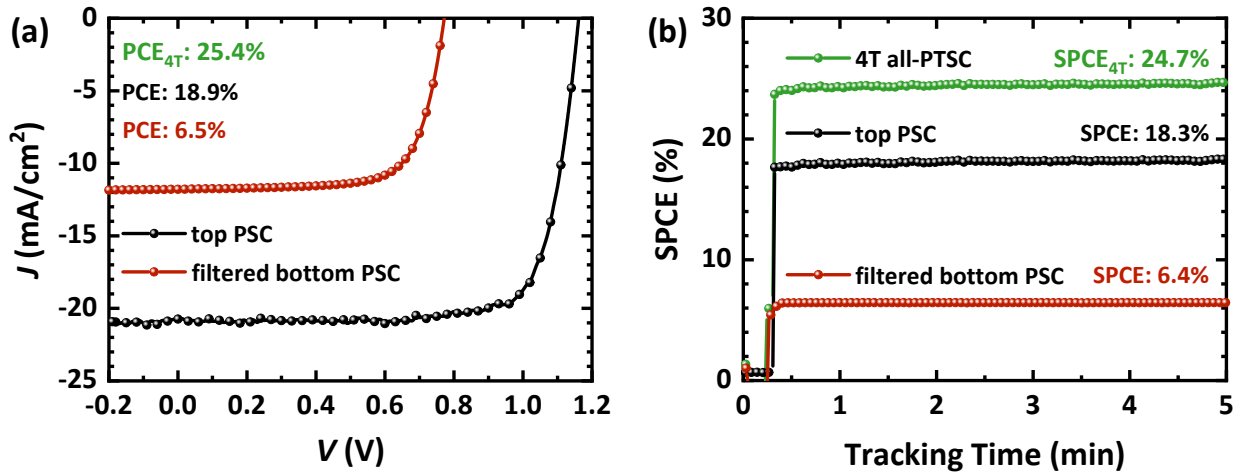

**Fig. S12.** (a) Current-density–voltage ( $J$ – $V$ ) scans measured at a fixed rate of 0.6 V/s from the open-circuit voltage ( $V_{OC}$ ) to the short-circuit current ( $J_{SC}$ ), and (b) maximum power point (MPP) tracking measurements of a single-junction semi-transparent top PSC ( $E_g = 1.65$  eV), a single-junction filtered LBG bottom PSC ( $E_g = 1.26$  eV) covered with an anti-reflection PDMS foil, under AM 1.5G illumination ( $100$  mW/cm<sup>2</sup>) at 25°C.  $PCE_{4T}$  and  $SPCE_{4T}$  are the calculated PCE and stabilized PCE derived from the  $J$ – $V$  scans and MPP tracking measurements for the champion 4T all-PTSC, respectively.

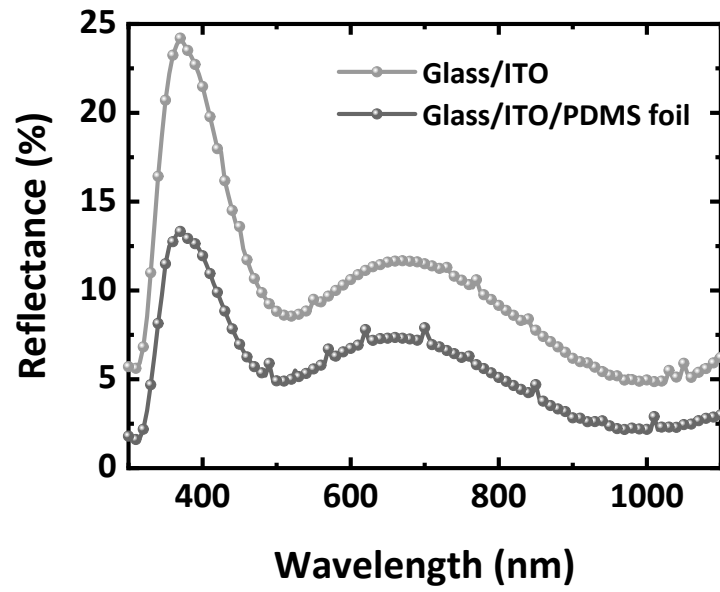

**Fig. S13.** Reflectance spectra of an ITO glass substrate with and without a textured PDMS foil implemented on the front-side of the ITO glass substrate.

**Table S2.** Photovoltaic parameters derived from current-density–voltage ( $J$ – $V$ ) scans measured at a fixed rate of 0.6 V/s from the open-circuit voltage ( $V_{OC}$ ) to the short-circuit current ( $J_{SC}$ ) (backward scan) and from  $J_{SC}$  to  $V_{OC}$  (forward scan) for a champion semi-transparent top PSC and a filtered LBG bottom PSC while an anti-reflection PDMS foil was applied in front side of the device. The stabilized PCEs (SPCEs) of the top and filtered bottom PSCs and the corresponding calculated 4T all-perovskite tandem solar cell (all-PTSC) are given in bold.

| Perovskite solar cell (PSC)          | Scan Direction | $V_{OC}$ (V) | $J_{SC}$ (mA/cm <sup>2</sup> ) | FF (%) | PCE (%)     | SPCE (%)    |
|--------------------------------------|----------------|--------------|--------------------------------|--------|-------------|-------------|
| Semi-transparent top PSC (with PDMS) | Backward       | 1.16         | 20.7                           | 78.6   | <b>18.9</b> | <b>18.3</b> |
|                                      | Forward        | 1.13         | 21.0                           | 74.4   | <b>17.7</b> |             |
| Filtered LBG bottom PSC (with PDMS)  | Backward       | 0.77         | 11.7                           | 72.0   | <b>6.5</b>  | <b>6.4</b>  |
|                                      | Forward        | 0.76         | 11.7                           | 67.5   | <b>6.0</b>  |             |
| 4T all-PTSC (with PDMS)              | Backward       |              |                                |        | <b>25.4</b> | <b>24.7</b> |
|                                      | Forward        |              |                                |        | <b>23.7</b> |             |
